# Supplementary material for: Effects of Nitrogen and Phosphorus Inputs on Soil Bacterial Abundance, Diversity, and Community Composition in Chinese Fir Plantations
Source: PubMed Central journal article supplement (PMC6060263; doi:10.3389/fmicb.2018.01543), 2018-07-19

**Effects of nitrogen and phosphorus inputs on soil bacterial abundance, diversity  
and community composition in Chinese fir plantations**

Qing Wang<sup>a,b\*</sup>, Cong Wang<sup>c</sup>, WeiWei Yu<sup>b</sup>, Ali Turak<sup>d,\*</sup>, Diwen Chen<sup>a</sup>, Ying Huang<sup>a</sup>,  
Junhua Ao<sup>a,\*</sup>, Yong Jiang<sup>a</sup>, Zhenrui Huang<sup>a</sup>

a

*Guangdong Provincial Bioengineering Institute (Guangzhou Sugarcane Industry  
Research Institute), Guangdong Key Laboratory of Sugarcane Improvement and  
Biorefinery, Guangzhou 510316, China.*

b

*State Key Laboratory of Urban and Regional Ecology, Research Center for  
Eco-Environmental Sciences, Chinese Academy of Sciences, Beijing 100085, China.*

c

*Guangdong Key Laboratory of Integrated Agro-environmental Pollution Control and  
Management, Guangdong Institute of Eco-environmental Science and Technology,  
Guangzhou 510650, PR China.*

d

*Science and Technology Management Dept. Sinofert Holdings Ltd. Level 10, Central  
Tower, Chemsunny World Trade Center, 28 Fuxingmeng Nei Street, Beijing, P.R.  
100031, China*

\*Corresponding author: Qing Wang      Email address: wangqing316000@163.com

\*Corresponding author: Junhua Ao      Email address: huangqiong870730@163.com

Table S1 Pearson correlation coefficients between soil properties and bacterial 16S

rRNA gene abundance. Values in bold indicate significant correlations ( $p < 0.05$ ).

|                                     | <b>r</b> | <b>p</b>         |
|-------------------------------------|----------|------------------|
| <b>pH</b>                           | 0.915    | <b>&lt;0.001</b> |
| <b>NH<sub>4</sub><sup>+</sup>-N</b> | -0.838   | <b>&lt;0.001</b> |
| <b>NO<sub>3</sub><sup>-</sup>-N</b> | -0.824   | <b>&lt;0.001</b> |
| <b>DOC</b>                          | -0.33    | 0.209            |
| <b>TN</b>                           | -0.821   | <b>&lt;0.001</b> |
| <b>AP</b>                           | -0.034   | 0.986            |

Table S2 Raw sequence reads, trimmed reads and the average length of sequences (bp) across all soil samples.

| Treatment | Plot number | Raw reads in total | Trimmed reads | Average length of sequences(bp) |
|-----------|-------------|--------------------|---------------|---------------------------------|
| CK        | 1           | 25778              | 25504         | 409.6                           |
|           | 2           | 28511              | 28071         | 412.1                           |
|           | 3           | 36557              | 35991         | 409.7                           |
|           | 4           | 33219              | 32857         | 406.8                           |
| P         | 5           | 42533              | 41159         | 408.1                           |
|           | 6           | 31403              | 30577         | 407.7                           |
|           | 7           | 36588              | 35797         | 401.9                           |
|           | 8           | 27957              | 27508         | 409.3                           |
| N         | 9           | 27214              | 26991         | 407.4                           |
|           | 10          | 27059              | 26707         | 406.1                           |
|           | 11          | 33976              | 32996         | 405.6                           |
|           | 12          | 31742              | 30529         | 410.5                           |
| NP        | 13          | 33976              | 32996         | 405.6                           |
|           | 14          | 28618              | 28016         | 410.6                           |
|           | 15          | 27612              | 27001         | 409.3                           |
|           | 16          | 39821              | 31159         | 409.4                           |

Table S3 Results of PERMANOVA for testing the effects of N, P addition and their interactions on bacterial community structure. *p* values ( $p < 0.05$ ) are indicated in bold.

|                  | <b>F</b> | <b><i>p</i></b> |
|------------------|----------|-----------------|
| <b>CK vs P</b>   | 0.737    | 0.868           |
| <b>CK vs N</b>   | 2.597    | <b>0.024</b>    |
| <b>CK vs N+P</b> | 2.577    | <b>0.026</b>    |
| <b>P vs N</b>    | 3.076    | <b>0.026</b>    |
| <b>P vs N+P</b>  | 2.696    | <b>0.023</b>    |
| <b>N vs N+P</b>  | 0.884    | 0.413           |

Table S4 Relationships of soil bacterial community composition with soil chemical variables, as revealed by Mantel test. Values in bold indicate significant correlations ( $p < 0.05$ ).

| Variable | <b>pH</b>    | <b>NH<sub>4</sub><sup>+</sup>-N</b> | <b>NO<sub>3</sub><sup>-</sup>-N</b> | <b>DOC</b> | <b>TN</b>    | <b>AP</b> |
|----------|--------------|-------------------------------------|-------------------------------------|------------|--------------|-----------|
| <b>r</b> | 0.46         | 0.38                                | 0.33                                | 0.25       | 0.32         | -0.055    |
| <b>p</b> | <b>0.003</b> | <b>0.002</b>                        | <b>0.004</b>                        | 0.054      | <b>0.003</b> | 0.69      |

FigureS1 Effects of N and/or P addition on the KEGG Orthology numbers, which was used for functional predictions. Data are means  $\pm$  standard deviation (n=4). Significance is indicated by  $**p<0.01$

Figure S1

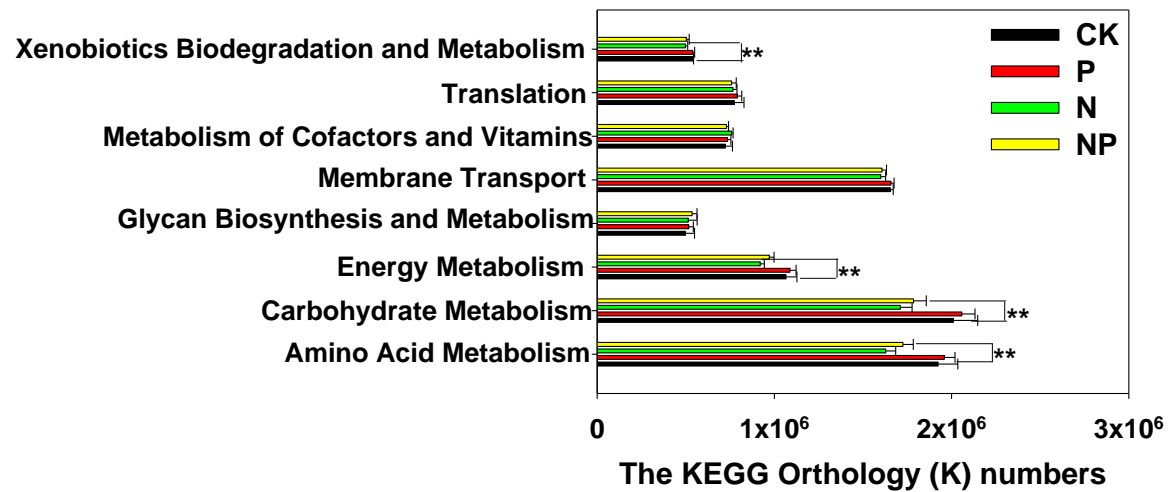

Supplement: Data_Sheet_1.pdf [file Data_Sheet_1.pdf]
